# Supplementary material for: Identification of Simple Sequence Repeat Biomarkers through Cross-Species Comparison in a Tag Cloud Representation
Source: Hindawi journal article supplement (doi:10.1155/2014/678971), 2014-01-01
Supplement: f1 [file 678971.f1.pdf]

## Supplementary Document

**Table S1: An orthologous gene list containing 162 genes from 12 selected model species. Each gene possesses a sequence identity higher than 80% compared to human genome mutually.**

| Ensembl Gene ID | Gene Name      | Description                                                                                       |
|-----------------|----------------|---------------------------------------------------------------------------------------------------|
| ENSG00000006042 | <i>TMEM98</i>  | transmembrane protein 98                                                                          |
| ENSG00000013016 | <i>EHD3</i>    | EH-domain containing 3                                                                            |
| ENSG00000025800 | <i>KPNA6</i>   | karyopherin alpha 6 (importin alpha 7)                                                            |
| ENSG00000044574 | <i>HSPA5</i>   | heat shock 70kDa protein 5 (glucose-regulated protein, 78kDa)                                     |
| ENSG00000047249 | <i>ATP6V1H</i> | ATPase, H <sup>+</sup> transporting, lysosomal 50/57kDa, V1 subunit H                             |
| ENSG00000048540 | <i>LMO3</i>    | LIM domain only 3 (rhombotin-like 2)                                                              |
| ENSG00000054803 | <i>CBLN4</i>   | cerebellin 4 precursor                                                                            |
| ENSG00000055163 | <i>CYFIP2</i>  | cytoplasmic FMR1 interacting protein 2                                                            |
| ENSG00000061676 | <i>NCKAP1</i>  | NCK-associated protein 1                                                                          |
| ENSG00000061918 | <i>GUCY1B3</i> | guanylate cyclase 1, soluble, beta 3                                                              |
| ENSG00000062725 | <i>APPBP2</i>  | amyloid beta precursor protein (cytoplasmic tail) binding protein 2                               |
| ENSG00000066117 | <i>SMARCD1</i> | SWI/SNF related, matrix associated, actin dependent regulator of chromatin, subfamily d, member 1 |
| ENSG00000066777 | <i>ARFGEF1</i> | ADP-ribosylation factor guanine nucleotide-exchange factor 1 (brefeldin A-inhibited)              |
| ENSG00000068793 | <i>CYFIP1</i>  | cytoplasmic FMR1 interacting protein 1                                                            |
| ENSG00000069329 | <i>VPS35</i>   | vacuolar protein sorting 35 homolog ( <i>S. cerevisiae</i> )                                      |
| ENSG00000070718 | <i>AP3M2</i>   | adaptor-related protein complex 3, mu 2 subunit                                                   |

|                 |                 |                                                                                           |
|-----------------|-----------------|-------------------------------------------------------------------------------------------|
| ENSG00000073712 | <i>FERMT2</i>   | fermitin family member 2                                                                  |
| ENSG00000075290 | <i>WNT8B</i>    | wingless-type MMTV integration site family, member 8B                                     |
| ENSG00000077147 | <i>TM9SF3</i>   | transmembrane 9 superfamily member 3                                                      |
| ENSG00000077458 | <i>FAM76B</i>   | family with sequence similarity 76, member B                                              |
| ENSG00000077549 | <i>CAPZB</i>    | capping protein (actin filament) muscle Z-line, beta                                      |
| ENSG00000078142 | <i>PIK3C3</i>   | phosphoinositide-3-kinase, class 3                                                        |
| ENSG00000079785 | <i>DDX1</i>     | DEAD (Asp-Glu-Ala-Asp) box polypeptide 1                                                  |
| ENSG00000084623 | <i>EIF3I</i>    | eukaryotic translation initiation factor 3, subunit I                                     |
| ENSG00000086475 | <i>SEPHS1</i>   | selenophosphate synthetase 1                                                              |
| ENSG00000087191 | <i>PSMC5</i>    | proteasome (prosome, macropain) 26S subunit, ATPase, 5                                    |
| ENSG00000100206 | <i>DMC1</i>     | DMC1 dosage suppressor of mck1 homolog, meiosis-specific homologous recombination (yeast) |
| ENSG00000100220 | <i>C22orf28</i> | chromosome 22 open reading frame 28                                                       |
| ENSG00000100280 | <i>APIB1</i>    | adaptor-related protein complex 1, beta 1 subunit                                         |
| ENSG00000100353 | <i>EIF3D</i>    | eukaryotic translation initiation factor 3, subunit D                                     |
| ENSG00000100410 | <i>PHF5A</i>    | PHD finger protein 5A                                                                     |
| ENSG00000100528 | <i>CNIH</i>     | cornichon homolog (Drosophila)                                                            |
| ENSG00000100796 | <i>SMEK1</i>    | SMEK homolog 1, suppressor of mek1 (Dictyostelium)                                        |
| ENSG00000100934 | <i>SEC23A</i>   | Sec23 homolog A ( <i>S. cerevisiae</i> )                                                  |
| ENSG00000101146 | <i>RAE1</i>     | RAE1 RNA export 1 homolog ( <i>S. pombe</i> )                                             |
| ENSG00000101310 | <i>SEC23B</i>   | Sec23 homolog B ( <i>S. cerevisiae</i> )                                                  |
| ENSG00000101460 | <i>MAP1LC3A</i> | microtubule-associated protein 1 light chain 3 alpha                                      |

|                 |                |                                                                                    |
|-----------------|----------------|------------------------------------------------------------------------------------|
| ENSG00000102978 | <i>POLR2C</i>  | polymerase (RNA) II (DNA directed) polypeptide C, 33kDa                            |
| ENSG00000103043 | <i>VAC14</i>   | Vac14 homolog ( <i>S. cerevisiae</i> )                                             |
| ENSG00000105258 | <i>POLR2I</i>  | polymerase (RNA) II (DNA directed) polypeptide I, 14.5kDa                          |
| ENSG00000105443 | <i>CYTH2</i>   | cytohesin 2                                                                        |
| ENSG00000105618 | <i>PRPF31</i>  | PRP31 pre-mRNA processing factor 31 homolog ( <i>S. cerevisiae</i> )               |
| ENSG00000107105 | <i>ELAVL2</i>  | ELAV (embryonic lethal, abnormal vision, <i>Drosophila</i> )-like 2 (Hu antigen B) |
| ENSG00000108055 | <i>SMC3</i>    | structural maintenance of chromosomes 3                                            |
| ENSG00000108061 | <i>SHOC2</i>   | soc-2 suppressor of clear homolog ( <i>C. elegans</i> )                            |
| ENSG00000108306 | <i>FBXL20</i>  | F-box and leucine-rich repeat protein 20                                           |
| ENSG00000108379 | <i>WNT3</i>    | wingless-type MMTV integration site family, member 3                               |
| ENSG00000108591 | <i>DRG2</i>    | developmentally regulated GTP binding protein 2                                    |
| ENSG00000108883 | <i>EFTUD2</i>  | elongation factor Tu GTP binding domain containing 2                               |
| ENSG00000109956 | <i>B3GAT1</i>  | beta-1,3-glucuronyltransferase 1 (glucuronosyltransferase P)                       |
| ENSG00000110367 | <i>DDX6</i>    | DEAD (Asp-Glu-Ala-Asp) box polypeptide 6                                           |
| ENSG00000110906 | <i>KCTD10</i>  | potassium channel tetramerisation domain containing 10                             |
| ENSG00000111530 | <i>CAND1</i>   | cullin-associated and neddylation-dissociated 1                                    |
| ENSG00000111707 | <i>SUDS3</i>   | suppressor of defective silencing 3 homolog ( <i>S. cerevisiae</i> )               |
| ENSG00000111783 | <i>RFX4</i>    | regulatory factor X, 4 (influences HLA class II expression)                        |
| ENSG00000112237 | <i>CCNC</i>    | cyclin C                                                                           |
| ENSG00000112282 | <i>MED23</i>   | mediator complex subunit 23                                                        |
| ENSG00000112308 | <i>C6orf62</i> | chromosome 6 open reading frame 62                                                 |

|                 |                 |                                                                             |
|-----------------|-----------------|-----------------------------------------------------------------------------|
| ENSG00000112333 | <i>NR2E1</i>    | nuclear receptor subfamily 2, group E, member 1                             |
| ENSG00000112335 | <i>SNX3</i>     | sorting nexin 3                                                             |
| ENSG00000113369 | <i>ARRDC3</i>   | arrestin domain containing 3                                                |
| ENSG00000113595 | <i>TRIM23</i>   | tripartite motif containing 23                                              |
| ENSG00000113719 | <i>ERGIC1</i>   | endoplasmic reticulum-golgi intermediate compartment (ERGIC) 1              |
| ENSG00000114030 | <i>KPNA1</i>    | karyopherin alpha 1 (importin alpha 5)                                      |
| ENSG00000114388 | <i>NPRL2</i>    | nitrogen permease regulator-like 2 ( <i>S. cerevisiae</i> )                 |
| ENSG00000115866 | <i>DARS</i>     | aspartyl-tRNA synthetase                                                    |
| ENSG00000116586 | <i>LAMTOR2</i>  | late endosomal/lysosomal adaptor, MAPK and MTOR activator 2                 |
| ENSG00000117153 | <i>KLHL12</i>   | kelch-like 12 ( <i>Drosophila</i> )                                         |
| ENSG00000117505 | <i>DRI</i>      | down-regulator of transcription 1, TBP-binding (negative cofactor 2)        |
| ENSG00000119487 | <i>MAPKAP1</i>  | mitogen-activated protein kinase associated protein 1                       |
| ENSG00000119820 | <i>YIPF4</i>    | Yip1 domain family, member 4                                                |
| ENSG00000120509 | <i>PDZD11</i>   | PDZ domain containing 11                                                    |
| ENSG00000121022 | <i>COPS5</i>    | COP9 constitutive photomorphogenic homolog subunit 5 ( <i>Arabidopsis</i> ) |
| ENSG00000123159 | <i>GIPC1</i>    | GIPC PDZ domain containing family, member 1                                 |
| ENSG00000123353 | <i>ORMDL2</i>   | ORM1-like 2 ( <i>S. cerevisiae</i> )                                        |
| ENSG00000123374 | <i>CDK2</i>     | cyclin-dependent kinase 2                                                   |
| ENSG00000123395 | <i>C12orf44</i> | chromosome 12 open reading frame 44                                         |
| ENSG00000123908 | <i>EIF2C2</i>   | eukaryotic translation initiation factor 2C, 2                              |
| ENSG00000124207 | <i>CSE1L</i>    | CSE1 chromosome segregation 1-like ( <i>yeast</i> )                         |

|                 |                |                                                                        |
|-----------------|----------------|------------------------------------------------------------------------|
| ENSG00000124209 | <i>RAB22A</i>  | RAB22A, member RAS oncogene family                                     |
| ENSG00000125037 | <i>TMEM111</i> | transmembrane protein 111                                              |
| ENSG00000125354 | <i>SEPT6</i>   | septin 6                                                               |
| ENSG00000125820 | <i>NKX2-2</i>  | NK2 homeobox 2                                                         |
| ENSG00000125851 | <i>PCSK2</i>   | proprotein convertase subtilisin/kexin type 2                          |
| ENSG00000126970 | <i>ZC4H2</i>   | zinc finger, C4H2 domain containing                                    |
| ENSG00000127054 | <i>CPSF3L</i>  | cleavage and polyadenylation specific factor 3-like                    |
| ENSG00000127774 | <i>TMEM93</i>  | transmembrane protein 93                                               |
| ENSG00000127922 | <i>SHFM1</i>   | split hand/foot malformation (ectrodactyly) type 1                     |
| ENSG00000128699 | <i>ORMDL1</i>  | ORM1-like 1 ( <i>S. cerevisiae</i> )                                   |
| ENSG00000129083 | <i>COPB1</i>   | coatamer protein complex, subunit beta 1                               |
| ENSG00000129562 | <i>DAD1</i>    | defender against cell death 1                                          |
| ENSG00000130520 | <i>LSM4</i>    | LSM4 homolog, U6 small nuclear RNA associated ( <i>S. cerevisiae</i> ) |
| ENSG00000132142 | <i>ACACA</i>   | acetyl-CoA carboxylase alpha                                           |
| ENSG00000132356 | <i>PRKAA1</i>  | protein kinase, AMP-activated, alpha 1 catalytic subunit               |
| ENSG00000132640 | <i>BTBD3</i>   | BTB (POZ) domain containing 3                                          |
| ENSG00000132646 | <i>PCNA</i>    | proliferating cell nuclear antigen                                     |
| ENSG00000132912 | <i>DCTN4</i>   | dynactin 4 (p62)                                                       |
| ENSG00000133119 | <i>RFC3</i>    | replication factor C (activator 1) 3, 38kDa                            |
| ENSG00000134014 | <i>ELP3</i>    | elongation protein 3 homolog ( <i>S. cerevisiae</i> )                  |
| ENSG00000134058 | <i>CDK7</i>    | cyclin-dependent kinase 7                                              |
| ENSG00000135932 | <i>CAB39</i>   | calcium binding protein 39                                             |

|                 |                |                                                                                                   |
|-----------------|----------------|---------------------------------------------------------------------------------------------------|
| ENSG00000136518 | <i>ACTL6A</i>  | actin-like 6A                                                                                     |
| ENSG00000137522 | <i>RNF121</i>  | ring finger protein 121                                                                           |
| ENSG00000137822 | <i>TUBGCP4</i> | tubulin, gamma complex associated protein 4                                                       |
| ENSG00000137947 | <i>GTF2B</i>   | general transcription factor IIB                                                                  |
| ENSG00000140612 | <i>SEC11A</i>  | SEC11 homolog A ( <i>S. cerevisiae</i> )                                                          |
| ENSG00000140829 | <i>DHX38</i>   | DEAH (Asp-Glu-Ala-His) box polypeptide 38                                                         |
| ENSG00000141429 | <i>GALNT1</i>  | UDP-N-acetyl-alpha-D-galactosamine:polypeptide<br>N-acetylgalactosaminyltransferase 1 (GalNAc-T1) |
| ENSG00000144043 | <i>TEX261</i>  | testis expressed 261                                                                              |
| ENSG00000144231 | <i>POLR2D</i>  | polymerase (RNA) II (DNA directed) polypeptide D                                                  |
| ENSG00000144580 | <i>RQCD1</i>   | RCD1 required for cell differentiation1 homolog ( <i>S. pombe</i> )                               |
| ENSG00000144935 | <i>TRPC1</i>   | transient receptor potential cation channel, subfamily C, member 1                                |
| ENSG00000145817 | <i>YIPF5</i>   | Yip1 domain family, member 5                                                                      |
| ENSG00000145833 | <i>DDX46</i>   | DEAD (Asp-Glu-Ala-Asp) box polypeptide 46                                                         |
| ENSG00000147164 | <i>SNX12</i>   | sorting nexin 12                                                                                  |
| ENSG00000148606 | <i>POLR3A</i>  | polymerase (RNA) III (DNA directed) polypeptide A, 155kDa                                         |
| ENSG00000148943 | <i>LIN7C</i>   | lin-7 homolog C ( <i>C. elegans</i> )                                                             |
| ENSG00000149100 | <i>EIF3M</i>   | eukaryotic translation initiation factor 3, subunit M                                             |
| ENSG00000151348 | <i>EXT2</i>    | exostosin 2                                                                                       |
| ENSG00000151729 | <i>SLC25A4</i> | solute carrier family 25 (mitochondrial carrier; adenine nucleotide<br>translocator), member 4    |
| ENSG00000154473 | <i>BUB3</i>    | budding uninhibited by benzimidazoles 3 homolog (yeast)                                           |
| ENSG00000157837 | <i>SPPL3</i>   | Signal peptide peptidase-like 3                                                                   |

|                 |               |                                                                                      |
|-----------------|---------------|--------------------------------------------------------------------------------------|
| ENSG00000158864 | <i>NDUFS2</i> | NADH dehydrogenase (ubiquinone) Fe-S protein 2, 49kDa<br>(NADH-coenzyme Q reductase) |
| ENSG00000159210 | <i>SNF8</i>   | SNF8, ESCRT-II complex subunit, homolog ( <i>S. cerevisiae</i> )                     |
| ENSG00000160563 | <i>MED27</i>  | mediator complex subunit 27                                                          |
| ENSG00000162374 | <i>ELAVL4</i> | ELAV (embryonic lethal, abnormal vision, <i>Drosophila</i> )-like 4 (Hu antigen D)   |
| ENSG00000162409 | <i>PRKAA2</i> | protein kinase, AMP-activated, alpha 2 catalytic subunit                             |
| ENSG00000163479 | <i>SSR2</i>   | signal sequence receptor, beta (translocon-associated protein beta)                  |
| ENSG00000163625 | <i>WDFY3</i>  | WD repeat and FYVE domain containing 3                                               |
| ENSG00000163636 | <i>PSMD6</i>  | proteasome (prosome, macropain) 26S subunit, non-ATPase, 6                           |
| ENSG00000164091 | <i>WDR82</i>  | WD repeat domain 82                                                                  |
| ENSG00000164167 | <i>LSM6</i>   | LSM6 homolog, U6 small nuclear RNA associated ( <i>S. cerevisiae</i> )               |
| ENSG00000164332 | <i>UBLCP1</i> | ubiquitin-like domain containing CTD phosphatase 1 [                                 |
| ENSG00000164576 | <i>SAP30L</i> | SAP30-like                                                                           |
| ENSG00000165630 | <i>PRPF18</i> | PRP18 pre-mRNA processing factor 18 homolog ( <i>S. cerevisiae</i> )                 |
| ENSG00000166407 | <i>LMO1</i>   | LIM domain only 1 (rhombotin 1)                                                      |
| ENSG00000166747 | <i>APIG1</i>  | adaptor-related protein complex 1, gamma 1 subunit                                   |
| ENSG00000166887 | <i>VPS39</i>  | vacuolar protein sorting 39 homolog ( <i>S. cerevisiae</i> )                         |
| ENSG00000167965 | <i>MLST8</i>  | MTOR associated protein, LST8 homolog ( <i>S. cerevisiae</i> )                       |
| ENSG00000168291 | <i>PDHB</i>   | pyruvate dehydrogenase (lipoamide) beta                                              |
| ENSG00000168301 | <i>KCTD6</i>  | potassium channel tetramerisation domain containing 6                                |
| ENSG00000168385 | <i>SEPT2</i>  | septin 2                                                                             |
| ENSG00000169504 | <i>CLIC4</i>  | chloride intracellular channel 4                                                     |

|                 |                |                                                                              |
|-----------------|----------------|------------------------------------------------------------------------------|
| ENSG00000170312 | <i>CDK1</i>    | cyclin-dependent kinase 1                                                    |
| ENSG00000172318 | <i>B3GALT1</i> | UDP-Gal:betaGlcNAc beta 1,3-galactosyltransferase, polypeptide 1             |
| ENSG00000173418 | <i>NAA20</i>   | N(alpha)-acetyltransferase 20, NatB catalytic subunit                        |
| ENSG00000174231 | <i>PRPF8</i>   | PRP8 pre-mRNA processing factor 8 homolog ( <i>S. cerevisiae</i> )           |
| ENSG00000175087 | <i>PDIK1L</i>  | PDLIM1 interacting kinase 1 like                                             |
| ENSG00000178307 | <i>TMEM11</i>  | transmembrane protein 11                                                     |
| ENSG00000181852 | <i>RNF41</i>   | ring finger protein 41                                                       |
| ENSG00000183207 | <i>RUVBL2</i>  | RuvB-like 2 ( <i>E. coli</i> )                                               |
| ENSG00000183475 | <i>ASB7</i>    | ankyrin repeat and SOCS box containing 7                                     |
| ENSG00000183726 | <i>TMEM50A</i> | transmembrane protein 50A                                                    |
| ENSG00000185009 | <i>AP3M1</i>   | adaptor-related protein complex 3, mu 1 subunit                              |
| ENSG00000185527 | <i>PDE6G</i>   | phosphodiesterase 6G, cGMP-specific, rod, gamma                              |
| ENSG00000185722 | <i>ANKFY1</i>  | ankyrin repeat and FYVE domain containing 1                                  |
| ENSG00000187555 | <i>USP7</i>    | ubiquitin specific peptidase 7 (herpes virus-associated)                     |
| ENSG00000196655 | <i>TRAPPC4</i> | trafficking protein particle complex 4                                       |
| ENSG00000198700 | <i>IPO9</i>    | importin 9                                                                   |
| ENSG00000203879 | <i>GDI1</i>    | GDP dissociation inhibitor 1                                                 |
| ENSG00000204628 | <i>GNB2L1</i>  | guanine nucleotide binding protein (G protein), beta polypeptide<br>2-like 1 |
| ENSG00000213246 | <i>SUPT4H1</i> | suppressor of Ty 4 homolog 1 ( <i>S. cerevisiae</i> )                        |
